# Supplementary material for: Simultaneous Pathoproteomic Evaluation of the Dystrophin-Glycoprotein Complex and Secondary Changes in the mdx-4cv Mouse Model of Duchenne Muscular Dystrophy
Source: PubMed Central journal article supplement (PMC4498307; doi:10.3390/biology4020397), 2015-06-10
Supplement: biology-04-00397-s001.pdf [file biology-04-00397-s001.pdf]

# Supplementary Materials

**Table S1.** List of changed proteins with a reduced concentration of less than 3-fold in *mdx-4cv* microsomes.

| Accession No. | Protein Name                                                | Peptide Count | Confidence Score | Anova ( <i>p</i> ) | Fold Change |
|---------------|-------------------------------------------------------------|---------------|------------------|--------------------|-------------|
| P15626        | Glutathione S-transferase Mu 2                              | 2             | 130.8            | 0.004045           | -2.92       |
| P17563        | Selenium-binding protein 1                                  | 6             | 336.2            | 0.001289           | -2.92       |
| Q99LC5        | Electron transfer flavoprotein subunit alpha, mitochondrial | 2             | 71.5             | 0.002063           | -2.92       |
| P70402        | Myosin-binding protein H                                    | 7             | 405.8            | 0.013635           | -2.90       |
| P47857        | 6-phosphofructokinase, muscle type                          | 8             | 588.7            | 0.020360           | -2.84       |
| Q8C0M9        | Isoaspartyl peptidase/L-asparaginase                        | 4             | 206.7            | 0.000256           | -2.83       |
| P04247        | Myoglobin                                                   | 12            | 1654.9           | 0.000525           | -2.82       |
| Q8VCT4        | Carboxylesterase 1D                                         | 8             | 421.1            | 0.005918           | -2.81       |
| P06801        | NADP-dependent malic enzyme                                 | 6             | 194.7            | 0.000931           | -2.77       |
| P42669        | Transcriptional activator protein Pur-alpha                 | 5             | 406.5            | 0.001367           | -2.72       |
| P82347        | Delta-sarcoglycan                                           | 3             | 255.1            | 0.033834           | -2.59       |
| O55103        | Periaxin                                                    | 23            | 1163.1           | 0.010324           | -2.58       |
| Q61234        | Alpha-1-syntrophin                                          | 4             | 102.7            | 0.008697           | -2.58       |
| Q5XKE0        | Myosin-binding protein C, fast-type                         | 3             | 54.0             | 0.027034           | -2.53       |
| P70195        | Proteasome subunit beta type-7                              | 3             | 244.3            | 0.003034           | -2.51       |
| Q62234        | Myomesin-1                                                  | 72            | 4983.3           | 0.001161           | -2.49       |
| Q05920        | Pyruvate carboxylase, mitochondrial                         | 20            | 1047.0           | 0.003850           | -2.48       |
| P58771        | Tropomyosin alpha-1 chain                                   | 3             | 93.2             | 0.028163           | -2.48       |
| Q9EQ20        | Methylmalonate-semialdehyde dehydrogenase, mitochondrial    | 2             | 119.3            | 0.016796           | -2.46       |
| P05977        | Myosin light chain 1/3, skeletal muscle isoform             | 2             | 127.0            | 0.044906           | -2.41       |
| Q9QZ47        | Troponin T, fast skeletal muscle                            | 2             | 277.0            | 0.004359           | -2.37       |
| Q8BKZ9        | Pyruvate dehydrogenase protein X component, mitochondrial   | 19            | 1589.9           | 0.000349           | -2.34       |
| Q9DAK9        | 14 kDa phosphohistidine phosphatase                         | 4             | 316.3            | 0.000121           | -2.31       |
| Q8R1G2        | Carboxymethylglutaryl-CoA lyase homolog                     | 3             | 266.2            | 0.025153           | -2.31       |
| P04370        | Myelin basic protein                                        | 4             | 223.5            | 0.014370           | -2.30       |
| P09405        | Nucleolin                                                   | 12            | 717.6            | 0.001197           | -2.30       |
| Q8VCR8        | Myosin light chain kinase 2, skeletal/cardiac muscle        | 3             | 120.9            | 5.90E-05           | -2.27       |
| P54775        | 26S protease regulatory subunit 6B                          | 13            | 746.0            | 0.000148           | -2.25       |
| Q99MN9        | Propionyl-CoA carboxylase beta chain, mitochondrial         | 9             | 421.8            | 0.007876           | -2.18       |
| Q60675        | Laminin subunit alpha-2                                     | 4             | 178.3            | 0.001218           | -2.17       |
| P46471        | 26S protease regulatory subunit 7                           | 7             | 392.4            | 0.008889           | -2.12       |
| P62204        | Calmodulin                                                  | 4             | 402.5            | 0.007982           | -2.11       |
| P26443        | Glutamate dehydrogenase 1, mitochondrial                    | 3             | 196.8            | 8.78E-05           | -2.07       |
| Q6P8J7        | Creatine kinase S-type, mitochondrial                       | 4             | 263.7            | 0.013513           | -2.06       |
| Q5SX39        | Myosin-4                                                    | 5             | 274.5            | 0.027764           | -2.04       |
| O54962        | Barrier-to-autointegration factor                           | 4             | 259.5            | 0.003174           | -2.04       |
| Q8BG32        | 26S proteasome non-ATPase regulatory subunit 11             | 2             | 90.1             | 0.017666           | -2.03       |

**Table S2.** List of changed proteins with an increased concentration of less than 5-fold in *mdx-4cv* microsomes.

| Accession No. | Protein Name                                                           | Peptide Count | Confidence Score | Anova ( <i>p</i> ) | Fold Change |
|---------------|------------------------------------------------------------------------|---------------|------------------|--------------------|-------------|
| P08752        | Guanine nucleotide-binding protein G(i) subunit alpha-2                | 5             | 197.1            | 0.003593           | 4.95        |
| P49300        | C-type lectin domain family 10 member A                                | 3             | 356.8            | 2.08E-05           | 4.89        |
| P84078        | ADP-ribosylation factor 1                                              | 7             | 132.4            | 0.002455           | 4.83        |
| Q9D6F9        | Tubulin beta-4A chain                                                  | 2             | 43.9             | 0.003541           | 4.82        |
| Q8R5J9        | PRA1 family protein 3                                                  | 5             | 421.6            | 0.004263           | 4.81        |
| Q8BY89        | Choline transporter-like protein 2                                     | 4             | 147.9            | 0.030126           | 4.80        |
| Q9DCN2        | NADH-cytochrome b5 reductase 3                                         | 8             | 832.3            | 0.002056           | 4.68        |
| Q8BLF1        | Neutral cholesterol ester hydrolase 1                                  | 3             | 180.1            | 0.014434           | 4.63        |
| P26039        | Talin-1                                                                | 5             | 250.3            | 0.000536           | 4.51        |
| Q9CPU4        | Microsomal glutathione S-transferase 3                                 | 4             | 187.2            | 0.033598           | 4.47        |
| Q91V61        | Sideroflexin-3                                                         | 7             | 448.4            | 0.002239           | 4.43        |
| Q08857        | Platelet glycoprotein 4                                                | 3             | 133.6            | 0.037377           | 4.39        |
| P08226        | Apolipoprotein E                                                       | 6             | 404.5            | 1.98E-05           | 4.39        |
| Q9Z0M6        | CD97 antigen                                                           | 4             | 215.9            | 0.000687           | 4.38        |
| O88587        | Catechol O-methyltransferase                                           | 3             | 206.3            | 0.026071           | 4.33        |
| Q3TDQ1        | Dolichyl-diphosphooligosaccharide protein glycosyltransferase SU-STT3B | 4             | 213.4            | 0.006603           | 4.32        |
| B2RXS4        | Plexin-B2                                                              | 3             | 96.5             | 0.000328           | 4.31        |
| Q61735        | Leukocyte surface antigen CD47                                         | 2             | 131.1            | 0.007560           | 4.30        |
| P51881        | ADP/ATP translocase 2                                                  | 5             | 177.1            | 0.000472           | 4.25        |
| O35643        | AP-1 complex subunit beta-1                                            | 2             | 141.3            | 0.002891           | 4.19        |
| Q3TZZ7        | Extended synaptotagmin-2                                               | 4             | 302.8            | 0.023359           | 4.14        |
| P01899        | H-2 class I histocompatibility antigen, D-B alpha chain                | 5             | 188.1            | 0.000257           | 4.04        |
| Q9ESD7        | Dysferlin                                                              | 15            | 780.6            | 0.029892           | 4.02        |
| Q3U7R1        | Extended synaptotagmin-1                                               | 10            | 546.4            | 0.005081           | 4.01        |
| P49817        | Caveolin-1                                                             | 4             | 159.9            | 0.024592           | 3.98        |
| P10833        | Ras-related protein R-Ras                                              | 2             | 51.8             | 0.015348           | 3.97        |
| Q61738        | Integrin alpha-7                                                       | 13            | 808.7            | 0.004887           | 3.97        |
| P40124        | Adenylyl cyclase-associated protein 1                                  | 2             | 233.2            | 0.004418           | 3.97        |
| P06909        | Complement factor H                                                    | 4             | 124.0            | 0.010462           | 3.97        |
| Q9D1G3        | Protein-cysteine N-palmitoyltransferase HHAT-like protein              | 2             | 123.9            | 0.038319           | 3.81        |
| P27659        | 60S ribosomal protein L3                                               | 5             | 222.6            | 0.001766           | 3.80        |
| Q8C7X2        | ER membrane protein complex subunit 1                                  | 2             | 71.0             | 0.031930           | 3.79        |
| Q8VDN2        | Sodium/potassium-transporting ATPase subunit alpha-1                   | 6             | 442.1            | 0.043888           | 3.73        |
| P10107        | Annexin A1                                                             | 19            | 1011.6           | 0.002737           | 3.70        |
| O55026        | Ectonucleoside triphosphate diphosphohydrolase 2                       | 4             | 197.2            | 0.008935           | 3.68        |
| P50427        | Steryl-sulfatase                                                       | 3             | 223.1            | 0.007529           | 3.64        |
| P35564        | Calnexin                                                               | 7             | 399.6            | 0.012743           | 3.63        |
| P29621        | Serine protease inhibitor A3C                                          | 2             | 251.0            | 0.003331           | 3.62        |
| Q91X72        | Hemopexin                                                              | 15            | 602.3            | 0.001611           | 3.61        |
| Q9EQ06        | Estradiol 17-beta-dehydrogenase 11                                     | 2             | 53.8             | 0.031562           | 3.60        |
| Q60634        | Flotillin-2                                                            | 7             | 198.8            | 0.018138           | 3.59        |

Table S2. Cont.

| Accession No. | Protein Name                                            | Peptide<br>Count | Confidence<br>Score | Anova ( <i>p</i> ) | Fold<br>Change |
|---------------|---------------------------------------------------------|------------------|---------------------|--------------------|----------------|
| Q62188        | Dihydropyrimidinase-related protein 3                   | 2                | 79.0                | 0.000619           | 3.51           |
| Q80WJ7        | Protein LYRIC                                           | 3                | 108.8               | 0.010382           | 3.46           |
| Q8R127        | Saccharopine dehydrogenase-like oxidoreductase          | 2                | 53.7                | 0.018803           | 3.44           |
| Q3UMR5        | Calcium uniporter protein, mitochondrial                | 5                | 452.2               | 0.007146           | 3.43           |
| P07759        | Serine protease inhibitor A3K                           | 9                | 659.2               | 0.007933           | 3.43           |
| Q8BJS4        | SUN domain-containing protein 2                         | 2                | 130.8               | 0.003953           | 3.42           |
| Q9Z1W8        | Potassium-transporting ATPase alpha chain 2             | 2                | 167.9               | 0.032004           | 3.41           |
| Q9D1G1        | Ras-related protein Rab-1B                              | 2                | 53.1                | 0.025936           | 3.35           |
| P31428        | Dipeptidase 1                                           | 3                | 128.4               | 0.015513           | 3.34           |
| Q62465        | Synaptic vesicle membrane protein VAT-1 homolog         | 4                | 133.9               | 0.001136           | 3.29           |
| Q61543        | Golgi apparatus protein 1                               | 5                | 229.1               | 0.013191           | 3.25           |
| Q9D666        | SUN domain-containing protein 1                         | 2                | 45.0                | 0.001556           | 3.25           |
| P29788        | Vitronectin                                             | 5                | 263.7               | 0.000396           | 3.23           |
| P20918        | Plasminogen                                             | 2                | 110.0               | 0.018958           | 3.20           |
| Q9D783        | Kelch-like protein 40                                   | 3                | 152.4               | 0.004784           | 3.19           |
| P99024        | Tubulin beta-5 chain                                    | 5                | 503.4               | 0.000555           | 3.18           |
| Q61830        | Macrophage mannose receptor 1                           | 27               | 1385.3              | 0.000607           | 3.11           |
| P70452        | Syntaxin-4                                              | 3                | 109.9               | 0.004505           | 3.09           |
| Q61838        | Alpha-2-macroglobulin                                   | 29               | 1607.5              | 0.000155           | 3.09           |
| Q9DBH5        | Vesicular integral-membrane protein VIP36               | 5                | 172.6               | 0.011157           | 3.07           |
| O35969        | Guanidinoacetate N-methyltransferase                    | 2                | 84.8                | 0.001370           | 3.07           |
| Q64310        | Surfeit locus protein 4                                 | 4                | 298.3               | 0.038601           | 3.06           |
| Q8BK84        | Dual specificity phosphatase DUPD1                      | 3                | 257.0               | 0.001066           | 3.05           |
| Q9WVA4        | Transgelin-2                                            | 3                | 192.0               | 0.000434           | 3.04           |
| O09161        | Calsequestrin-2                                         | 3                | 173.4               | 0.016830           | 3.03           |
| Q71LX4        | Talin-2                                                 | 2                | 48.9                | 0.003565           | 3.02           |
| B2RSH2        | Guanine nucleotide-binding protein G(i) subunit alpha-1 | 4                | 165.7               | 0.019610           | 2.97           |
| Q61207        | Sulfated glycoprotein 1                                 | 3                | 166.7               | 0.004729           | 2.96           |
| Q6PIE5        | Sodium/potassium-transporting ATPase subunit alpha-2    | 21               | 1375.1              | 0.017031           | 2.93           |
| Q9QUI0        | Transforming protein RhoA                               | 2                | 102.6               | 0.011610           | 2.92           |
| P22599        | Alpha-1-antitrypsin 1-2                                 | 4                | 271.0               | 0.001990           | 2.92           |
| Q61147        | Ceruloplasmin                                           | 3                | 177.5               | 0.002923           | 2.91           |
| P61027        | Ras-related protein Rab-10                              | 4                | 184.5               | 0.019421           | 2.91           |
| P28656        | Nucleosome assembly protein 1-like 1                    | 2                | 93.2                | 0.001014           | 2.89           |
| P97449        | Aminopeptidase N                                        | 14               | 965.1               | 0.003192           | 2.87           |
| P97429        | Annexin A4                                              | 14               | 1308.6              | 0.000114           | 2.87           |
| Q60770        | Syntaxin-binding protein 3                              | 2                | 68.0                | 0.001604           | 2.86           |
| Q8BW75        | Amine oxidase [flavin-containing] B                     | 3                | 164.0               | 0.008239           | 2.85           |
| P50543        | Protein S100-A11                                        | 2                | 156.9               | 0.001067           | 2.84           |
| O08917        | Flotillin-1                                             | 11               | 769.2               | 0.000308           | 2.83           |
| P35293        | Ras-related protein Rab-18                              | 6                | 330.2               | 0.026323           | 2.82           |
| Q6P5E4        | UDP-glucose:glycoprotein glucosyltransferase 1          | 10               | 511.3               | 0.005885           | 2.80           |
| Q8VDL4        | ADP-dependent glucokinase                               | 2                | 112.7               | 0.005399           | 2.79           |
| P07758        | Alpha-1-antitrypsin 1-1                                 | 14               | 1113.8              | 0.004016           | 2.79           |

Table S2. Cont.

| Accession No. | Protein Name                                        | Peptide<br>Count | Confidence<br>Score | Anova ( <i>p</i> ) | Fold<br>Change |
|---------------|-----------------------------------------------------|------------------|---------------------|--------------------|----------------|
| Q9WVK4        | EH domain-containing protein 1                      | 2                | 51.1                | 0.000614           | 2.72           |
| P28063        | Proteasome subunit beta type-8                      | 2                | 97.6                | 0.001538           | 2.70           |
| P62821        | Ras-related protein Rab-1A                          | 2                | 133.2               | 0.022868           | 2.69           |
| Q6PHN9        | Ras-related protein Rab-35                          | 3                | 174.0               | 0.015318           | 2.67           |
| P08003        | Protein disulfide-isomerase A4                      | 3                | 181.1               | 0.009967           | 2.64           |
| O08529        | Calpain-2 catalytic subunit                         | 4                | 124.7               | 0.003628           | 2.64           |
| P16675        | Lysosomal protective protein                        | 3                | 98.2                | 0.007661           | 2.62           |
| Q9D0F3        | Protein ERGIC-53                                    | 3                | 195.3               | 0.000296           | 2.62           |
| Q9EQK5        | Major vault protein                                 | 27               | 1951.9              | 0.000392           | 2.61           |
| P26041        | Moesin                                              | 9                | 501.0               | 0.000491           | 2.60           |
| Q07079        | Insulin-like growth factor-binding protein 5        | 4                | 183.7               | 8.77E-05           | 2.60           |
| P14733        | Lamin-B1                                            | 2                | 43.9                | 0.013669           | 2.60           |
| P62962        | Profilin-1                                          | 7                | 417.6               | 0.000737           | 2.58           |
| P97765        | WW domain-binding protein 2                         | 2                | 104.4               | 0.002495           | 2.58           |
| Q8BH64        | EH domain-containing protein 2                      | 3                | 157.9               | 0.003089           | 2.56           |
| P19324        | Serpin H1                                           | 10               | 409.5               | 0.003513           | 2.56           |
| Q8K273        | Membrane magnesium transporter 1                    | 2                | 126.1               | 0.020175           | 2.56           |
| P01872        | Ig mu chain C region                                | 5                | 367.3               | 0.009373           | 2.55           |
| Q922R8        | Protein disulfide-isomerase A6                      | 7                | 311.1               | 0.001110           | 2.54           |
| Q07076        | Annexin A7                                          | 11               | 602.3               | 0.000181           | 2.54           |
| P14094        | Sodium/potassium-transporting ATPase subunit beta-1 | 11               | 643.3               | 0.003179           | 2.54           |
| P48036        | Annexin A5                                          | 13               | 1064.6              | 0.002893           | 2.52           |
| P24369        | Peptidyl-prolyl cis-trans isomerase B               | 4                | 266.8               | 0.000249           | 2.51           |
| Q61334        | B-cell receptor-associated protein 29               | 3                | 207.2               | 0.006147           | 2.50           |
| P42208        | Septin-2                                            | 2                | 53.8                | 0.009304           | 2.49           |
| P20152        | Vimentin                                            | 19               | 1180.9              | 0.002422           | 2.47           |
| P32261        | Antithrombin-III                                    | 2                | 120.1               | 0.025224           | 2.46           |
| Q61335        | B-cell receptor-associated protein 31               | 2                | 288.5               | 0.003516           | 2.46           |
| P60766        | Cell division control protein 42 homolog            | 5                | 252.5               | 0.010639           | 2.45           |
| P61979        | Heterogeneous nuclear ribonucleoprotein K           | 5                | 325.9               | 0.001316           | 2.44           |
| P16546        | Spectrin alpha chain, non-erythrocytic 1            | 4                | 242.2               | 0.001063           | 2.44           |
| P51150        | Ras-related protein Rab-7a                          | 7                | 228.8               | 0.016446           | 2.43           |
| P29391        | Ferritin light chain 1                              | 14               | 1094.6              | 0.001140           | 2.42           |
| P24549        | Retinal dehydrogenase 1                             | 6                | 182.4               | 0.006477           | 2.42           |
| Q9Z1E4        | Glycogen [starch] synthase, muscle                  | 3                | 208.5               | 0.030318           | 2.41           |
| P62746        | Rho-related GTP-binding protein RhoB                | 2                | 88.5                | 0.021120           | 2.40           |
| Q61475        | Complement decay-accelerating factor, GPI-anchored  | 3                | 126.4               | 0.009179           | 2.39           |
| P21614        | Vitamin D-binding protein                           | 4                | 111.0               | 0.017952           | 2.39           |
| P70302        | Stromal interaction molecule 1                      | 13               | 989.1               | 0.000960           | 2.37           |
| P16045        | Galectin-1                                          | 7                | 649.3               | 0.000405           | 2.37           |
| P09055        | Integrin beta-1                                     | 9                | 617.5               | 0.001226           | 2.36           |
| O70252        | Heme oxygenase 2                                    | 3                | 101.1               | 0.004367           | 2.36           |
| P17047        | Lysosome-associated membrane glycoprotein 2         | 2                | 46.1                | 7.84E-05           | 2.36           |
| Q6ZWW3        | 60S ribosomal protein L10                           | 6                | 261.0               | 0.013502           | 2.36           |

Table S2. Cont.

| Accession No. | Protein Name                                                          | Peptide<br>Count | Confidence<br>Score | Anova ( <i>p</i> ) | Fold<br>Change |
|---------------|-----------------------------------------------------------------------|------------------|---------------------|--------------------|----------------|
| Q64727        | Vinculin                                                              | 13               | 851.5               | 0.000227           | 2.36           |
| Q9CVB6        | Actin-related protein 2/3 complex subunit 2                           | 4                | 200.1               | 0.004120           | 2.33           |
| A2AMM0        | Muscle-related coiled-coil protein                                    | 5                | 293.7               | 0.004820           | 2.33           |
| Q8VCM8        | Nicalin                                                               | 4                | 356.7               | 0.013996           | 2.32           |
| P62835        | Ras-related protein Rap-1A                                            | 8                | 470.6               | 0.017144           | 2.31           |
| P01887        | Beta-2-microglobulin                                                  | 3                | 164.1               | 0.000290           | 2.30           |
| Q6GQT9        | Nodal modulator 1                                                     | 10               | 566.3               | 0.008738           | 2.30           |
| Q9DBG6        | Dolichyl-diphosphooligosaccharide-protein<br>glycosyltransferase SU-2 | 7                | 471.1               | 0.012763           | 2.29           |
| Q91ZX7        | Prolow-density lipoprotein receptor-related protein 1                 | 3                | 169.6               | 0.006003           | 2.26           |
| P18760        | Cofilin-1                                                             | 6                | 306.6               | 0.010858           | 2.22           |
| Q9DB73        | NADH-cytochrome b5 reductase 1                                        | 7                | 427.2               | 0.003680           | 2.21           |
| Q91VI7        | Ribonuclease inhibitor                                                | 6                | 382.7               | 6.54E-05           | 2.21           |
| Q99P72        | Reticulon-4                                                           | 5                | 421.3               | 0.008373           | 2.21           |
| P13020        | Gelsolin                                                              | 6                | 452.3               | 0.012795           | 2.19           |
| Q99KV1        | DnaJ homolog subfamily B member 11                                    | 3                | 139.2               | 0.008446           | 2.19           |
| P07356        | Annexin A2                                                            | 19               | 1500.3              | 0.002916           | 2.17           |
| Q6ZQI3        | Malectin                                                              | 5                | 156.3               | 0.026901           | 2.17           |
| P63001        | Ras-related C3 botulinum toxin substrate 1                            | 3                | 83.9                | 0.004156           | 2.16           |
| P27773        | Protein disulfide-isomerase A3                                        | 19               | 1063.9              | 0.005435           | 2.16           |
| Q60605        | Myosin light polypeptide 6                                            | 2                | 107.2               | 0.015891           | 2.16           |
| Q61316        | Heat shock 70 kDa protein 4                                           | 3                | 157.5               | 0.001483           | 2.15           |
| Q01339        | Beta-2-glycoprotein 1                                                 | 7                | 320.8               | 0.030850           | 2.14           |
| Q8BFZ9        | Erlin-2                                                               | 2                | 75.6                | 0.043537           | 2.13           |
| P51885        | Lumican                                                               | 7                | 426.4               | 0.019648           | 2.13           |
| P07309        | Transthyretin                                                         | 5                | 504.8               | 0.020417           | 2.12           |
| P09103        | Protein disulfide-isomerase                                           | 19               | 1223.2              | 0.018494           | 2.12           |
| Q9JKR6        | Hypoxia up-regulated protein 1                                        | 10               | 568.5               | 0.009349           | 2.12           |
| Q8VEH8        | Endoplasmic reticulum lectin 1                                        | 2                | 85.8                | 0.010297           | 2.11           |
| Q8C7E7        | Starch-binding domain-containing protein 1                            | 3                | 61.1                | 0.003248           | 2.10           |
| P55772        | Ectonucleoside triphosphate diphosphohydrolase 1                      | 2                | 7.6                 | 0.045918           | 2.10           |
| O88384        | Vesicle transport through interaction with t-SNAREs<br>homolog 1B     | 2                | 64.0                | 0.000786           | 2.10           |
| P26645        | Myristoylated alanine-rich C-kinase substrate                         | 2                | 108.5               | 0.001837           | 2.09           |
| Q9DBC7        | cAMP-dependent protein kinase type I-alpha regulatory<br>subunit      | 5                | 187.3               | 0.007118           | 2.08           |
| Q9JII6        | Alcohol dehydrogenase [NADP(+)]                                       | 2                | 104.9               | 0.003829           | 2.07           |
| Q01730        | Ras suppressor protein 1                                              | 2                | 157.2               | 0.016782           | 2.06           |
| O08677        | Kininogen-1                                                           | 5                | 101.1               | 0.004696           | 2.05           |
| Q91YQ5        | Dolichyl-diphosphooligosaccharide-protein<br>glycosyltransferase SU-1 | 10               | 510.1               | 0.024405           | 2.04           |
| P50516        | V-type proton ATPase catalytic subunit A                              | 3                | 191.7               | 0.000247           | 2.04           |

Table S2. Cont.

| Accession No. | Protein Name                                                         | Peptide Count | Confidence Score | Anova (p) | Fold Change |
|---------------|----------------------------------------------------------------------|---------------|------------------|-----------|-------------|
| Q04447        | Creatine kinase B-type                                               | 3             | 147.0            | 0.015351  | 2.03        |
| O54734        | Dolichyl-diphosphooligosaccharide-protein glycosyltransferase 48 kDa | 3             | 116.3            | 0.017382  | 2.03        |
| Q91V41        | Ras-related protein Rab-14                                           | 3             | 164.7            | 0.027554  | 2.03        |
| P63158        | High mobility group protein B1                                       | 4             | 315.3            | 0.005203  | 2.01        |
| P62814        | V-type proton ATPase subunit B, brain isoform                        | 3             | 185.2            | 0.000798  | 2.01        |
| Q05816        | Fatty acid-binding protein, epidermal                                | 2             | 44.2             | 0.010133  | 2.00        |

Interaction map of altered proteins in the *mdx-4cv* microsomal fraction

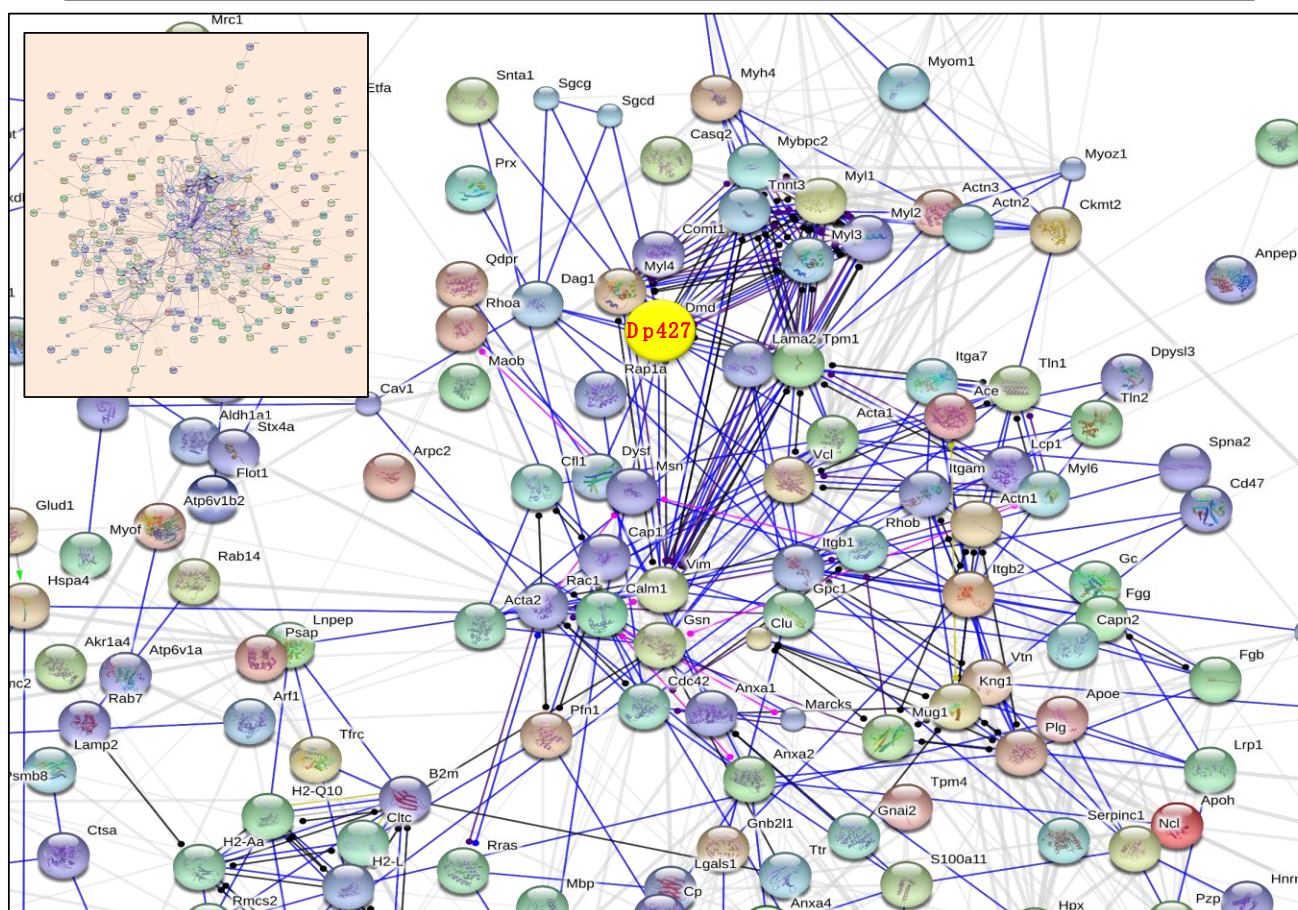

**Figure S1.** Interaction map of altered microsomal proteins from *mdx-4cv* hind limb muscle. The bioinformatics STRING database was applied to generate a protein interaction map with known and predicted protein associations that include direct physical and indirect functional protein linkages. The analysis of mass spectrometrically identified proteins with a changed abundance in *mdx-4cv* muscle was based on the proteomic data presented in Tables 1, 2, S1 and S2. The insert shows the entire interaction map and the main panel focuses on the central position of the dystrophin protein Dp427 (marked in yellow).

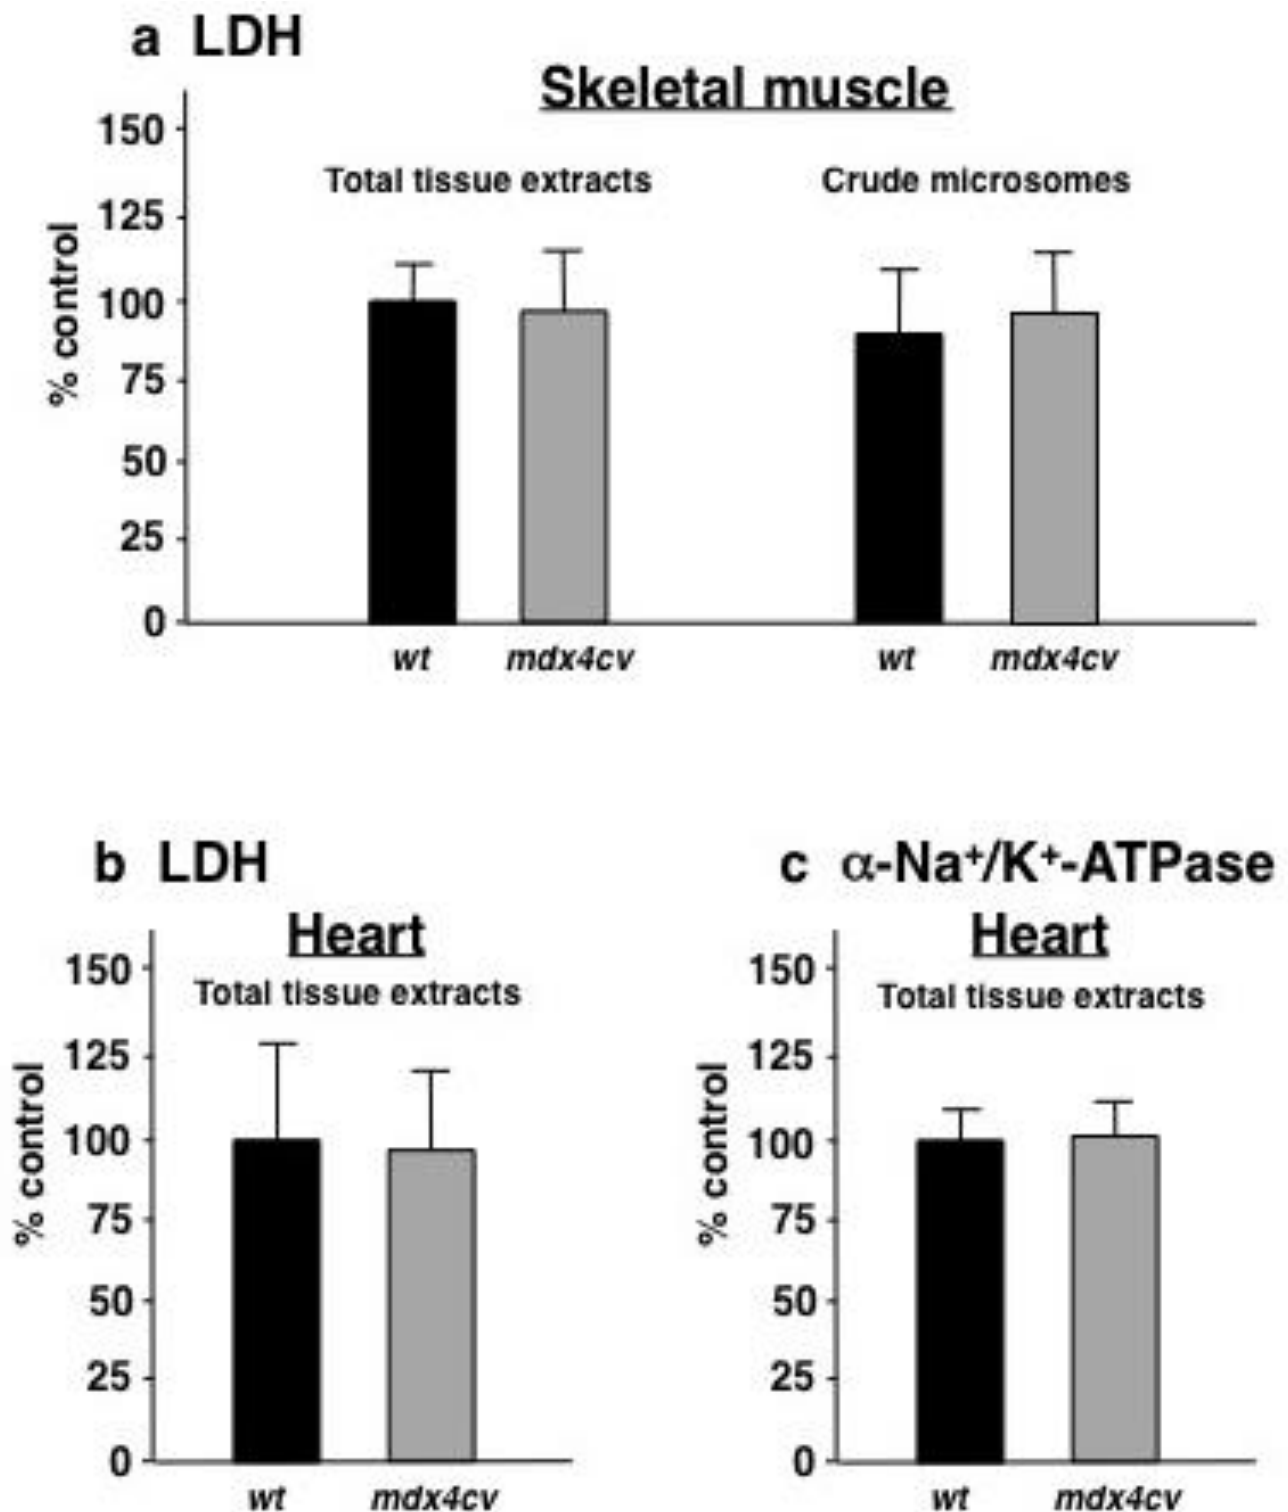

**Figure S2.** Graphical presentation of the control immunoblots shown in Figure 6, which displays primarily the immunoblot analysis of the Na<sup>+</sup>/K<sup>+</sup>-ATPase from *mdx-4cv* skeletal muscle. Shown are graphs of the immunoblotting results using antibodies to lactate dehydrogenase (LDH) (a), (b), as a loading control of both total tissue extracts and the crude microsomal preparations, and the cardiac Na<sup>+</sup>/K<sup>+</sup>-ATPase (c) in normal versus *mdx-4cv* preparations.

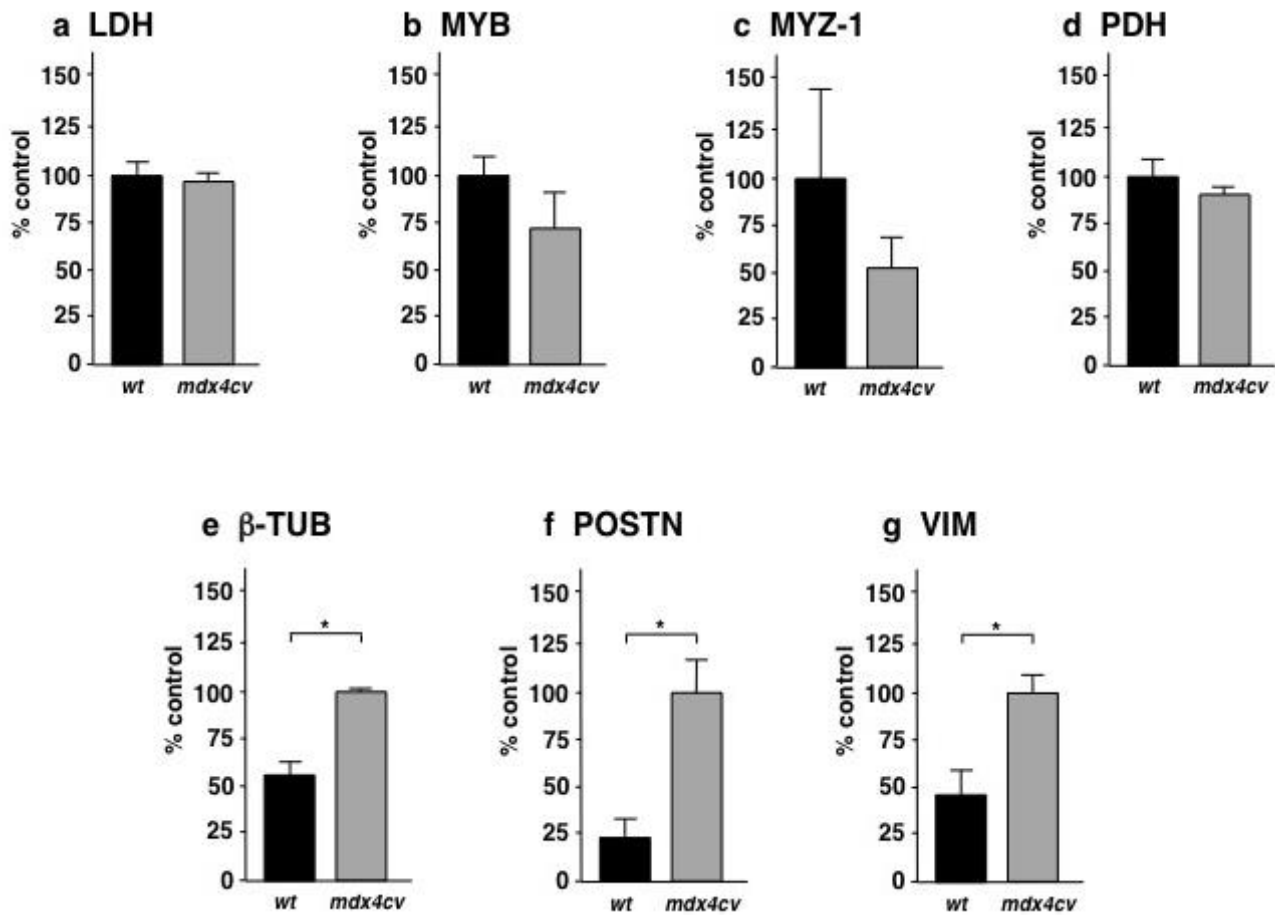

**Figure S3.** Graphical presentation of the immunoblotting survey of proteins with a changed abundance in *mdx-4cv* skeletal muscle tissue, presented in Figure 8. Shown are graphs of the immunoblotting results using antibodies to lactate dehydrogenase (LDH) (a), myoglobin (MYB) (b), myozenin (MYZ-1) (c), pyruvate dehydrogenase (PDH) (d),  $\beta$ -tubulin ( $\beta$ -TUB) (e), periostin (POSTN) (f) and vimentin (VIM) (g). Lanes 1 and 2 represent crude microsomes from wild type (*wt*) muscle and dystrophic *mdx-4cv* muscle, respectively. Student's *t*-test, unpaired;  $n = 4$ ; \*  $p < 0.05$ .
